1 **Positively interacting strains that circulate in a network structured**  
2 **population induce cycling epidemics of *Mycoplasma Pneumoniae***

3  
4 Xu-Sheng Zhang<sup>1,2</sup>, Hongxin Zhao<sup>1</sup>, Emilia Vynnycky<sup>1,3</sup>, and Vicki Chalker<sup>1</sup>

5 <sup>1</sup>Centre for Infectious Disease Surveillance and Control, Public Health England, London, UK

6 <sup>2</sup>Medical Research Council Centre for Outbreak Analysis and Modelling, Department of  
7 Infectious Disease Epidemiology, Imperial College School of Public Health, London, UK

8 <sup>3</sup>TB Modelling Group, TB Centre, Centre for Mathematical Modelling of Infectious Diseases  
9 and Faculty of Epidemiology and Population Health, London School of Hygiene and Tropical  
10 Medicine, London, UK.

11

12 Email: xu-sheng.zhang@phe.gov.uk

13

14 **Abstract** In many countries *Mycoplasma pneumoniae* (MP) epidemics last approximately

15 one to two years and occur every three to seven years. Poor understanding of the drivers of

16 recurrent MP epidemics limits the predictability of and dynamic responses to the outbreak.

17 Taking into account network structured contacts among people and co-circulating strains of

18 MP, we propose a multi-strain SIRS network model of epidemics of MP where different

19 strains interact during re-infection and within secondary infection. Simulations show that

20 although strain interactions and network-mediated spatial correlations are two separate

21 mechanisms for MP epidemics cycling, each requires very restricted model parameter values

22 such as strong strain interactions and strong network contacts, respectively. When both

23 mechanisms work collectively, MP recurrent epidemics become feasible within the plausible

24 ranges of model parameters. This indicates that positively interacting strains that co-circulate

25 within network contacts induce periodicity and dominant strain shift in observed MP

26 incidence.

27

28 **Keywords:** *Mycoplasma pneumoniae*, competition, strain interaction, infectious diseases,

29 contact network, recurrent (oscillatory) epidemics, dominant strain shift

30

## 31 Introduction

32 *Mycoplasma pneumoniae* (MP) is an “atypical” bacterium that causes acute respiratory  
33 infection in humans of all ages. *M. pneumoniae* is considered a common cause of pneumonia:  
34 MP causes about 15-20% adult community-acquired pneumonia (CAP) and up to 40% cases  
35 in children; however, not every infected patient actually develops pneumonia (Foy, 1993;  
36 Korppi *et al.*, 2004; Dumke *et al.*, 2012). MP infection generally tends to occur more  
37 frequently during the summer and autumn months when other respiratory pathogens are less  
38 prevalent; but the disease incidence does not appear to be related to season or geography  
39 (Waites and Talkington 2004; Winchell, 2013). For example, we also notice that MP  
40 infections have been observed to occur more frequently in winter months in England and  
41 Wales (Chalker *et al.*, 2011; Brown *et al.*, 2016). Epidemics of MP tend to occur every 3-7  
42 years in the general population (Chalker *et al.*, 2011; Jacobs, 2012; Brown *et al.*, 2016).  
43 Analysis of laboratory reports of MP infections in England and Wales from 1975 to 2009  
44 (Nguipdop-Djomo *et al.*, 2013) has indicated that these epidemics last on average 18 months  
45 occurring at approximately four yearly intervals. *M. pneumoniae* is a polymorphic pathogen  
46 (Dorigo-Zetsma *et al.*, 2000; Pereyre *et al.*, 2012): for example, Chalker *et al.* (2011)  
47 identified eleven strain types circulating in England and Wales during October 2010 to  
48 January 2011. MP strains can be differentiated based on differences in the P1 adhesin gene or  
49 in the number of repetitive sequences at a given genomic locus using multilocus variable  
50 number tandem repeat analysis (MLVA) (Dumke and Jacobs, 2011; Simmons *et al.*, 2013).  
51 Kenri *et al.* (2008) noticed that more than one serotype of MP were circulating within  
52 Japanese populations. Kogoj *et al.* (2017) observed a shift in the dominant MP strain between  
53 two epidemics that occurred in Slovenia in 2006 and 2016. Multiple strains of MP and their  
54 co-circulation were also observed in other countries (e.g., Dumke *et al.*, 2010; Spuesens *et*

55 *al.*, 2009; Martinez *et al.*, 2010; Zhao *et al.*, 2015; Brown *et al.*, 2016). Although there are  
56 many different isolates and strains, analysis of repetitive elements distributed in variable size  
57 and sequence over the genome of MP strains suggested two main types: P1 type 1 and P1  
58 type 2 (Kenri *et al.*, 2008; Spuesens *et al.*, 2009; Brown *et al.*, 2015; Dumke and Jacobs,  
59 2016).

60

61 Humans are the sole reservoir of MP and transmission requires close contact. Outbreaks  
62 typically occur within closed populations, such as in schools, military premises and prisons.  
63 Airborne spread of aerosols and, potentially, indirect contact with contaminated items, may  
64 contribute to transmission. The transmissibility of an infectious agent can be estimated by  
65 calculating the basic reproduction number ( $R_0$ ), which is defined as the mean number of  
66 secondary infectious cases generated by one primary infectious case introduced into a totally  
67 susceptible population (Anderson and May, 1991). Using seroprevalence data from a western  
68 population, Nguipdop-Djomo *et al.* (2013) estimated  $R_0$  of MP to be 1.7 (95% CI 1.6—1.9),  
69 indicating low transmissibility. The incubation period of MP averages 2 to 3 weeks. The  
70 duration of infectiousness is unclear and is commonly estimated to be up to 3 weeks from  
71 onset of illness (Clyde, 1993). Immunity occurs post infection, but later re-infection with  
72 different subtypes is recognized, suggesting the immunity is not lifelong and no strong cross  
73 protection between different subtypes (Foy *et al.*, 1977; Ito *et al.*, 2001; Dumke and Jacobs,  
74 2016). The duration of immunity ranges from 2 to 10 years (Lind *et al.*, 1997; Omori *et al.*,  
75 2015).

76

77 Seasonal forcing in transmission has been proposed as one determinant for the periodic  
78 patterns in other infectious diseases (Keeling and Rohani, 2008); however, Omori *et al.*  
79 (2015) found that the seasonal forcing that occurs annually cannot generate the multi-year

80 periodicity of MP incidence. They (Nakata and Omori, 2015; Omori *et al.*, 2015) further  
81 proposed that the certain finite delay in the progression from immunity to the susceptible may  
82 provide an explanation to the occurrence of the cyclic epidemics of MP infections. More  
83 concretely, Omori *et al.* (2015) show that “minor variation in the duration of immunity at the  
84 population level must be considered essential for the MP epidemic cycle because the MP  
85 cyclic incidence pattern did not replicate without it.” As shown in Figure 3 of Omori *et al.*  
86 (2015), this requires that the distribution for the duration of immunity should have a variance  
87 of around 0.63. Up to now no empirical data are available for estimating the distribution of  
88 the duration of MP immunity.

89

90 The MP incidence in England and Wales has declined (Brown *et al.*, 2016) following the  
91 widespread use of macrolides antibiotics since introduction in the late 1990s’ (Woodhead and  
92 Macfarlane, 2000). Due to the emergence of macrolide-resistant strains, MP infections are of  
93 increasing public health interest (Morozumi *et al.*, 2008; Zhao *et al.*, 2013). An understanding  
94 of the mechanisms by which recurrent epidemics of MP infection occur is urgently needed to  
95 enable control of future epidemics.

96

97 The two distinctive aspects of the MP epidemics: the prevalent serotype shifts among  
98 epidemics (Kenri *et al.*, 2008; Suzuki *et al.*, 2015; Zhao *et al.*, 2015; Brown *et al.*, 2016;  
99 Kogoj *et al.*, 2017) and cycling of MP incidence may be interconnected. This has been  
100 proposed before. Dumke *et al.* (2010) and Spuesens *et al.* (2009) argued that MP epidemics  
101 arise due to a change in the two main P1 types and variants of P1 sequences. Chalker et al  
102 (2011) observed increased incidence of MP infection correlating with co-circulation of  
103 multiple strains within the population of England and Wales. Brown *et al.* (2016) speculated  
104 that dominant strain shift may be the cause of recurrent MP epidemics in view of the presence

105 of multiple strains in observed increases of MP infection. Despite a lack of current data (due  
106 to limited focus on MP internationally and poor tools for detection and simultaneous strain  
107 discrimination) we speculate that serotype interactions such as synergistic associations and  
108 competition, in addition to the cross-immunity of differing P1 types, exist and play a possible  
109 role in the recurrent epidemics of MP infections. Previous transmission dynamics models (see  
110 the review of Omori *et al.* 2015) neglected the following phenomena: co-circulation within  
111 human populations of multiple strains of MP and network structural contact patterns among  
112 people. Infection transmission depends on the contact rate as well as whom each individual  
113 contacts. Recent studies (Mossong *et al.*, 2008) showed that people do not mix randomly. For  
114 example, contact patterns between people may display the characteristics of scale-free  
115 networks (Pastor-Satorras and Vespignani, 2001) or small-world networks (Watts and  
116 Strogatz, 1998). An important parameter of a network is its degree, defined as the number of  
117 other individuals to which one is connected. A well-mixed network (i.e., the loose network)  
118 will have a high average degree while a less mixed network should have a small average.  
119 Realistic networks of contacts that are relevant to infectious diseases usually have a small  
120 average degree (Leventhal *et al.*, 2015). On the contrary, the assumption of random mixing,  
121 in which every person is equally likely to contact any other person within the population  
122 (Keeling and Rohani, 2008; Diekmann *et al.*, 2013), results in a very large degree.

123

124 Network structured models describe the transmission dynamics as in spatial transmission  
125 processes among connected groups and thus induce spatial correlation between infections.  
126 Letting infection spread on a homogeneous population with a fixed random network  
127 structure, Rozhnova and Nunes (2009) illustrate that this spatial correlation within  
128 Susceptible-Infectious-Recovered-Susceptible models assists the generation of sustained  
129 cyclical epidemics. However, strong spatial correlation (i.e., strong network structure) was

130 needed for the cycles to persist when they just considered the transmission dynamics of a  
131 single strain in a population. Considering a two strain version of the SIRS epidemic network  
132 model (Zhang, 2016), the restriction on model parameters especially the degree of contacts is  
133 much relaxed. Recurrent epidemics were also predicted by models in a population which did  
134 not have a network structure, but in which people could be re-infected or co-infected with  
135 multiple strains (Zhang and Cao, 2014). Neither of these studies considered MP infection  
136 and we explore whether inclusion of both factors – a) competition between strains in a  
137 network-structured population and b) re-infection and co-infection with multiple strains – can  
138 explain the observed cycles in MP incidence

139

140

## 141 Models and Methods

### 142 **General structure of the model**

143 We consider a Susceptible-Infectious-Recovered-Susceptible, rather than a Susceptible-  
144 Exposure-Infectious-Recovered-Susceptible structure that has been used in other studies  
145 (Omori *et al.*, 2015). This simplicity is justified as we focus on the long term behaviour of  
146 MP transmission dynamics, and the exposure stage does not influence the overall  
147 transmissibility and long-term patterns (Diekmann *et al.*, 2013; Omori *et al.*, 2015). Since the  
148 many different isolates and strains of MP can be classified into two main types: P1 type 1 and  
149 P1 type 2 (Kenri *et al.*, 2008; Spuesens *et al.*, 2009; Brown *et al.*, 2015; Dumke and Jacobs,  
150 2016), our model just considers the transmission dynamics of two strains. Within the SIRS  
151 transmission dynamics model, a population of size  $N$  is modelled as a network in which every  
152 individual randomly contacts a fixed number ( $\kappa$ ) of other individuals, and is classified into  
153 eight compartments (Figure 1), namely those who are susceptible to infection with any strain  
154 (S), those who are infected and infectious with strain 1 or 2 ( $I_1$  and  $I_2$ ), those who have

155 recovered from infection with a given strain and are susceptible to infection with the other  
156 strain ( $R_1$  and  $R_2$ ), those who are infected and infectious with strain 1 or 2 after recovering  
157 from previous infection ( $J_1$  and  $J_2$ ) and those who are immune to infection with both strains  
158 ( $R$ ). We refer to people in the  $I_1$  and  $I_2$  compartments as those with “primary infection”, and  
159 to people in the  $J_1$  and  $J_2$  compartments as those with “secondary infection”. Individuals are  
160 denoted by nodes and contacts between individuals by edges.

161

162 The epidemic dynamics is determined by the following transmission and transition processes.  
163 Susceptible nodes ( $S$ ) become infected with strain  $i$ ,  $i = \{1,2\}$ , at rate  $\lambda$  through an edge with  
164 a node of primary infection  $I_i$ , or at rate  $v\lambda$  through an edge with a node of secondary  
165 infection  $J_i$ . Here parameter  $\lambda$  represents the constant transmission rate and parameter  $v$  is the  
166 relative infectiousness of a secondary infection, compared to a primary. Primarily infected  
167 nodes ( $I_i$ ) stay infectious on average for  $D$  days before becoming fully immune ( $R_i$ ) to the  
168 infecting strain  $i$  and partially so to the other strain. Recovered individuals ( $R_i$ ) stay immune  
169 for an average of  $d$  days before becoming susceptible again, or becoming secondarily infected  
170 at rate  $(1-\psi)\lambda$  through an edge linked with a node of infection ( $I_{3-i}$  or  $J_{3-i}$ ) to become  
171 secondarily infected  $J_{3-i}$ ,  $i=\{1,2\}$ . Here  $\psi$  reflects the reduction in susceptibility due to  
172 previous exposure to the other strain (i.e., cross-immunity). Nodes of secondary infection  $J_i$ ,  $i$   
173  $= \{1,2\}$  stay infectious for an average of  $\mu D$  days before becoming fully immune to all strains  
174 (i.e.,  $R$ ). Here parameter  $\mu$  defines the effect of having experienced primary infection on the  
175 duration of the secondary infection. Nodes of  $R$  stay fully immune for an average of  $d$  days  
176 before becoming susceptible again. Therefore naïve individuals are recruited into the  
177 population through birth and loss of immunity. These transitions and transmissions are  
178 defined according to the pairs or triplets involved in the process (Eames and Keeling, 2002;

179 Rozhnova and Nunes, 2009). For simplicity we ignore clustering in the network (c.f., Eames  
180 and Keeling, 2002; Leventhal *et al.*, 2015).

181

## 182 **Model equations**

183 Similar to Eames and Keeling (2002), the proportions of people in eight compartments are  
184 represented by [S], [I<sub>1</sub>], [I<sub>2</sub>], [R<sub>1</sub>], [R<sub>2</sub>], [J<sub>1</sub>], [J<sub>2</sub>], and [R]. Because of the constant population  
185 size (i.e., the constant number of nodes), [S] + [I<sub>1</sub>] + [I<sub>2</sub>] + [R<sub>1</sub>] + [R<sub>2</sub>] + [J<sub>1</sub>] + [J<sub>2</sub>] + [R] = 1.  
186 There are  $(8 \times 7) / 2 = 28$  heterogeneous pairs within the network in which the two nodes of a  
187 pair are of different states. The proportion of the population that is in a pair ([XY]) is defined  
188 as

$$189 \quad [XY] \approx \frac{n_{XY}}{\kappa N} \quad (1)$$

190 Here  $n_{XY}$  is the number of pairs within the population. The number of homogenous pairs can  
191 be found from these equations for heterogeneous pairs: e.g.,  $[RR] = (1 - \sum_{Y \neq R} [Y]) - \sum_{X \neq R} [XR]$

192 and  $[SS] = [S] - \sum_{X \neq S} [SX]$ . The state of the model system is defined by eight integers of nodes

193 and 28 integers of heterogeneous pairs. To focus on the impact of spatial correlation mediated  
194 by network structure (i.e., competition among the limited number of partners) and  
195 interactions between strains, two strains are simply assumed to be antigenically  
196 indistinguishable within linked patients.

197

198 Transmission of infection among nodes occurs through pair-link and the change of pairs is  
199 determined by the triples. To close the model system, the proportion, [XYZ], of the triple XYZ  
200 with node Y having contacts with both X and Z is approximated in terms of the proportion of  
201 pairs as in Eames and Keeling (2002),



$$202 \quad [XYZ] \approx \frac{k-1}{k} \frac{[XY][YZ]}{[Y]} \quad (2)$$

203 The flow chart of the transmission dynamics model is shown in Figure 1. The standard pair  
 204 approximation SIRS model of two strains is described by a set of  $28 + 7 = 35$  differential  
 205 equations as,

206 **Equations describing the time changes in 7 nodes**

$$207 \quad \frac{d}{dt}[S] = \frac{1}{L}(1-[S]) + \frac{1}{d}([R] + [R_1] + [R_2]) - \kappa(F_1 + F_2)$$

$$208 \quad \frac{d}{dt}[I_1] = -(\frac{1}{L} + \frac{1}{d})[I_1] + \kappa F_1$$

$$209 \quad \frac{d}{dt}[I_2] = -(\frac{1}{L} + \frac{1}{d})[I_2] + \kappa F_2$$

$$210 \quad \frac{d}{dt}[R_1] = -(\frac{1}{L} + \frac{1}{d})[R_1] + \frac{1}{d}[I_1] - \kappa G_2$$

$$211 \quad \frac{d}{dt}[R_2] = -(\frac{1}{L} + \frac{1}{d})[R_2] + \frac{1}{d}[I_2] - \kappa G_1$$

$$212 \quad \frac{d}{dt}[J_1] = -(\frac{1}{L} + \frac{1}{\mu d})[J_1] + \kappa G_1$$

$$213 \quad \frac{d}{dt}[J_2] = -(\frac{1}{L} + \frac{1}{\mu d})[J_2] + \kappa G_2 \quad (3a)$$

214 **Equations describing the time changes of 28 pairs**

$$215 \quad \frac{d}{dt}[SI_1] = \frac{1}{d}([I_1R] + [I_1R_2] + [I_1R_1]) - (\frac{1}{d} + \lambda)[SI_1] + (\kappa - 1) \left\{ \frac{([SS] - [SI_1])F_1 - [SI_1]F_2}{[S]} \right\} + \frac{1}{L}([I_1] - 2[SI_1])$$

$$216 \quad \frac{d}{dt}[SI_2] = \frac{1}{d}([I_2R] + [I_2R_2] + [I_2R_1]) - (\frac{1}{d} + \lambda)[SI_2] + (\kappa - 1) \left\{ \frac{([SS] - [SI_2])F_2 - [SI_2]F_1}{[S]} \right\} + \frac{1}{L}([I_2] - 2[SI_2])$$

$$217 \quad \frac{d}{dt}[SR_1] = \frac{1}{d}([R_1R] + ([R_1R_1] - [SR_1]) + [R_1R_2]) + \frac{1}{d}[SI_1] - (\kappa - 1) \left\{ \frac{F_1 + F_2}{[S]} + \frac{G_2}{[R_1]} \right\} [SR_1] + \frac{1}{L}([R_1] - 2[SR_1])$$

$$218 \quad \frac{d}{dt}[SR_2] = \frac{1}{d}([R_2R] + ([R_2R_2] - [SR_2]) + [R_2R_1]) + \frac{1}{d}[SI_2] - (\kappa - 1) \left\{ \frac{F_1 + F_2}{[S]} + \frac{G_1}{[R_2]} \right\} [SR_2] + \frac{1}{L}([R_2] - 2[SR_2])$$

$$219 \quad \frac{d}{dt}[SR] = \frac{1}{d}([RR] - [SR]) + [R_2R] + [R_1R] + \frac{1}{\mu d}([SJ_1] + [SJ_2]) - \frac{(\kappa - 1)[SR](F_1 + F_2)}{[S]} + \frac{1}{L}([R] - 2[SR])$$

$$220 \quad \frac{d}{dt}[SJ_1] = \frac{1}{d}([RJ_1] + [R_2J_1] + [R_1J_1]) - (\frac{1}{\mu d} + \nu\lambda)[SJ_1] - (\kappa - 1) \left\{ \frac{[SJ_1](F_1 + F_2)}{[S]} - \frac{[SR_2]G_1}{[R_2]} \right\} + \frac{1}{L}([J_1] - 2[SJ_1])$$

$$221 \quad \frac{d}{dt}[SJ_2] = \frac{1}{d}([RJ_2] + [R_2J_2] + [R_1J_2]) - (\frac{1}{\mu d} + \nu\lambda)[SJ_2] - (\kappa - 1) \left\{ \frac{[SJ_2](F_1 + F_2)}{[S]} - \frac{[SR_1]G_2}{[R_1]} \right\} + \frac{1}{L}([J_2] - 2[SJ_2])$$

$$\begin{aligned}
 222 \quad & \frac{d}{dt}[I_1I_2] = -2\left(\frac{1}{L} + \frac{1}{D}\right)[I_1I_2] + (\kappa - 1)\left\{\frac{[SI_2]F_1}{[S]} + \frac{[SI_1]F_2}{[S]}\right\} \\
 223 \quad & \frac{d}{dt}[I_1R_1] = -\left(\frac{2}{L} + \frac{1}{d}\right)[I_1R_1] + \frac{1}{D}([I_1I_1] - [I_1R_1]) + (\kappa - 1)\left\{\frac{[SR_1]F_1}{[S]} - [I_1R_1]\frac{G_2}{[R_1]}\right\} \\
 224 \quad & \frac{dp}{dt}[I_1R_2] = -\left\{\frac{2}{L} + \frac{1}{d} + \frac{1}{D} + \lambda(1 - \psi)\right\}[I_1R_2] + \frac{1}{D}[I_1I_2] + (\kappa - 1)\left\{\frac{[SR_2]F_1}{[S]} - [I_1R_2]\frac{G_1}{[R_2]}\right\} \\
 225 \quad & \frac{d}{dt}[I_1R] = -\left(\frac{2}{L} + \frac{1}{D} + \frac{1}{d}\right)[I_1R] + \frac{1}{\mu D}([I_1J_1] + [I_1J_2]) + (\kappa - 1)\frac{[SR]F_1}{[S]} \\
 226 \quad & \frac{d}{dt}[I_1J_1] = -\left(\frac{2}{L} + \frac{1}{D} + \frac{1}{\mu D}\right)[I_1J_1] + \nu\lambda[SJ_1] + \lambda(1 - \psi)[I_1R_2] + (\kappa - 1)\left\{\frac{[SJ_1]F_1}{[S]} + \frac{[I_1R_2]G_1}{[R_2]}\right\} \\
 227 \quad & \frac{d}{dt}[I_1J_2] = -\left(\frac{2}{L} + \frac{1}{D} + \frac{1}{\mu D}\right)[I_1J_2] + (\kappa - 1)\left\{\frac{[SJ_2]F_1}{[S]} + \frac{[I_1R_1]G_2}{[R_1]}\right\} \\
 228 \quad & \frac{d}{dt}[I_2R_1] = -\left\{\frac{2}{L} + \frac{1}{D} + \frac{1}{d} + \lambda(1 - \psi)\right\}[I_2R_1] + \frac{1}{D}[I_1I_2] + (\kappa - 1)\left\{\frac{[SR_1]F_2}{[S]} - [I_2R_1]\frac{G_2}{[R_1]}\right\} \\
 229 \quad & \frac{d}{dt}[I_2R_2] = -\left(\frac{2}{L} + \frac{1}{d}\right)[I_2R_2] + \frac{1}{D}([I_2I_2] - [I_2R_2]) + (\kappa - 1)\left\{\frac{[SR_2]F_2}{[S]} - [I_2R_2]\frac{G_1}{[R_2]}\right\} \\
 230 \quad & \frac{d}{dt}[I_2R] = -\left(\frac{2}{L} + \frac{1}{D} + \frac{1}{d}\right)[I_2R] + \frac{1}{\mu D}([I_2J_1] + [I_2J_2]) + (\kappa - 1)\frac{[SR]F_2}{[S]} \\
 231 \quad & \frac{d}{dt}[I_2J_1] = -\left(\frac{2}{L} + \frac{1}{D} + \frac{1}{\mu D}\right)[I_2J_1] + (\kappa - 1)\left\{\frac{[SJ_1]F_2}{[S]} + \frac{[I_2R_2]G_1}{[R_2]}\right\} \\
 232 \quad & \frac{d}{dt}[I_2J_2] = -\left(\frac{2}{L} + \frac{1}{D} + \frac{1}{\mu D}\right)[I_2J_2] + \nu\lambda[SJ_2] + \lambda(1 - \psi)[I_2R_1] + (\kappa - 1)\left\{\frac{[SJ_2]F_2}{[S]} + \frac{[I_2R_1]G_2}{[R_1]}\right\} \\
 233 \quad & \frac{d}{dt}[R_1R_2] = -2\left(\frac{1}{L} + \frac{1}{d}\right)[R_1R_2] + \frac{1}{D}([I_1R_2] + [I_2R_1]) - (\kappa - 1)[R_1R_2]\left\{\frac{G_2}{[R_1]} + \frac{G_1}{[R_2]}\right\} \\
 234 \quad & \frac{d}{dt}[R_1R] = -2\left(\frac{1}{L} + \frac{1}{d}\right)[R_1R] + \frac{1}{D}[I_1R] + \frac{1}{\mu D}([R_1J_1] + [R_1J_2]) - \frac{(\kappa - 1)[R_1R]G_2}{[R_1]} \\
 235 \quad & \frac{d}{dt}[R_1J_1] = -\left(\frac{2}{L} + \frac{1}{d} + \frac{1}{\mu D}\right)[R_1J_1] + \frac{1}{D}[I_1J_1] - (\kappa - 1)\left\{\frac{[R_1J_1]G_2}{[R_1]} - \frac{[R_1R_2]G_1}{[R_2]}\right\} \\
 236 \quad & \frac{d}{dt}[R_1J_2] = -\left\{\frac{2}{L} + \frac{1}{d} + \frac{1}{\mu D} + \nu(1 - \psi)\lambda\right\}[R_1J_2] + \frac{1}{D}[I_1J_2] + \frac{(\kappa - 1)([R_1R_1] - [R_1J_2])G_2}{[R_1]} \\
 237 \quad & \frac{d}{dt}[R_2R] = -2\left(\frac{1}{L} + \frac{1}{d}\right)[R_2R] + \frac{1}{D}[I_2R] + \frac{1}{\mu D}([R_2J_1] + [R_2J_2]) - \frac{(\kappa - 1)[R_2R]G_1}{[R_2]} \\
 238 \quad & \frac{d}{dt}[R_2J_1] = -\left\{\frac{2}{L} + \frac{1}{d} + \frac{1}{\mu D} + \nu(1 - \psi)\lambda\right\}[R_2J_1] + \frac{1}{D}[I_2J_1] + \frac{(\kappa - 1)([R_2R_2] - [R_2J_1])G_1}{[R_2]} \\
 239 \quad & \frac{d}{dt}[R_2J_2] = -\left(\frac{2}{L} + \frac{1}{d} + \frac{1}{\mu D}\right)[R_2J_2] + \frac{1}{D}[I_2J_2] + (\kappa - 1)\left\{\frac{[R_1R_2]G_2}{[R_1]} - \frac{[R_2J_2]G_1}{[R_2]}\right\}
 \end{aligned}$$

$$\begin{aligned}
 240 \quad \frac{d}{dt}[RJ_1] &= -\left(\frac{2}{L} + \frac{1}{d} + \frac{1}{\mu D}\right)[RJ_1] + \frac{1}{\mu D}([J_1J_1] + [J_1J_2]) + \frac{(\kappa-1)[R_2R]G_1}{[R_2]} \\
 241 \quad \frac{d}{dt}[RJ_2] &= -\left(\frac{2}{L} + \frac{1}{d} + \frac{1}{\mu D}\right)[RJ_2] + \frac{1}{\mu D}([J_2J_2] + [J_1J_2]) + \frac{(\kappa-1)[R_1R]G_2}{[R_1]} \\
 242 \quad \frac{d}{dt}[J_1J_2] &= -2\left(\frac{1}{L} + \frac{1}{\mu D}\right)[J_1J_2] + (\kappa-1)\left\{\frac{[R_2J_2]G_1}{[R_2]} + \frac{[R_1J_1]G_2}{[R_1]}\right\} \quad (3b)
 \end{aligned}$$

243 In the above equations, the different forces of infection are

$$244 \quad \text{Strain 1 infects } S \text{ individuals: } F_1 = \lambda([SI_1] + \nu[SJ_1])$$

$$245 \quad \text{Strain 2 infects } S \text{ individuals: } F_2 = \lambda([SI_2] + \nu[SJ_2])$$

$$246 \quad \text{Strain 1 infects } R_2 \text{ individuals: } G_1 = \lambda(1-\psi)([I_1R_2] + \nu[J_1R_2]) \quad (4)$$

$$247 \quad \text{Strain 2 infects } R_1 \text{ individuals: } G_2 = \lambda(1-\psi)([I_2R_1] + \nu[R_1J_2])$$

248

249 The parameters of the model system are defined in Table 1. Compared with the model  
 250 presented in Zhang (2016), here we introduce two interaction parameters to define the effects  
 251 of experiencing primary infection on infectivity ( $\nu$ ) and the duration ( $\mu$ ) of a secondary  
 252 infection. The complexity of the two strain network dynamics allows us to investigate the  
 253 combined effects of strain interactions (cross-immunity during re-infection and effects of the  
 254 primary infection on a secondary infection) on dynamic patterns of endemic infectious  
 255 diseases, along with spatial competition embedded within the random network. Ignoring the  
 256 stochasticity due to the limited size of population, here we focus on these by considering an  
 257 infinitely large population (i.e.,  $N \rightarrow \infty$ ).

258

## 259 **Methods**

260 We used Latin hypercube sampling (Iman *et al.*, 1981) to identify parameter values which led  
 261 to model predictions of cycles in incidence which were consistent with those observed. The

262 values of the following parameters were sampled within the ranges listed in Table 1:  
263 infectious period ( $D$ ), duration of immunity ( $d$ ), degree of contact network ( $\kappa$ ), cross-  
264 immunity ( $\psi$ ), effects of primary infection on infectivity ( $\nu$ ) and duration ( $\mu$ ) of a secondary  
265 infection. This was done with the function `randomLHS` of the package `lhs` in R computing  
266 language (R Development Core Team, 2015).

267

268 The basic reproduction number ( $R_0$ ) was fixed at 1.7 as estimated by Nguipdop-Djomo *et al.*  
269 (2013). When estimating  $R_0$ , Nguipdop-Djomo *et al.* (2013) assumed random mixing among  
270 individuals and didn't account for a network structured population. For a network structured  
271 population, the random mixing assumption will give rise to an over-estimate of  $R_0$  (Figure 2  
272 of Eames and Keeling, 2002), so we also consider this effect by assuming that  $R_0= 1.5$  and  
273 1.3 for MP. The total number of infections in our model includes both asymptomatic and  
274 symptomatic infections. Since MP may affect all age groups (e.g., Ito *et al.*, 2001; Chalker *et*  
275 *al.*, 2011; Brown *et al.*, 2016), we consider the situation in which the life span is 70 years, the  
276 worldwide average life expectancy according to the world fact book ([The World Fact-book](#)  
277 [Life Expectancy](#)).

278

279 A value for the interaction parameters  $\nu$  and  $\mu$  of 1.0 implies that there is no interaction on  
280 the 2<sup>nd</sup> infection from the primary infection (This is a special situation considered in Zhang  
281 (2016)). If they are less than 1.0, it means the interactions diminish the relevant process. On  
282 the contrary, if they are larger than 1.0, they enhance the processes. The ranges listed in Table  
283 1 allow both increasing and decreasing effects to be selected. To constrain the interactions  
284 within biologically reasonable limits, we allow both  $\nu$  and  $\mu$  to vary from 0.5 to 2.0. To  
285 consider the effect of network-mediated spatial correlation, the contact degree ( $\kappa$ ) is allowed  
286 to vary from 2.5 to 25.

287

288 The Runge-Kutta fourth order method was used to solve the model equations (3-4). As our  
289 dynamic system is deterministic, there is one dynamical time series under each set of  
290 parameter values. For each time series in which infection persists, weekly rates of new  
291 infections with each strain are recorded: the first 800 years were discarded and 200 years  
292 were used for analysis. To monitor the time series data and calculate the inter-epidemic  
293 periods if periodic changes in the incidence of both strains and total number of infections  
294 occur, the spectrum function in the R computing language (R Development Core Team,  
295 2015) is employed. The inter-epidemic period (or the duration of epidemic cycle) will be  
296 denoted by  $EpiT$ . Following Omori *et al.* (2015), the coefficient of variance (CV) of the  
297 incidence time series was used to define the shape of epidemic curve and the strength of  
298 oscillation in infections over time. Kenri *et al.* (2008) showed that the coefficient of variance  
299 (CV) in Japan MP epidemics 1982 to 1990 is about 0.7. In view of this, we regard the  
300 epidemics that possess the following characteristics as reasonable approximates to what has  
301 been empirically observed in MP epidemics:  $0.3 \leq CV \leq 1.4$  and  $3 \leq EpiT \leq 7$  years. In the  
302 following we refer to this as the “characteristically recurrent epidemics of MP”.

303

304 We study two specific scenarios in relation to the occurrence of MP epidemic cycles. First,  
305 assuming that two strains of MP interact only through the cross-immunity during the  
306 reinfection process (i.e.,  $\nu=\mu=1$ ) we sought to explore how network-structured contacts alone  
307 can help build up the characteristics of MP epidemics. Secondly we assume that the primary  
308 infection can influence the infectivity and duration of infectiousness of a secondary infection,  
309 in addition to the cross-immunity. Under this situation, we examine how these strain  
310 interactions can help generate sustained recurrent epidemics and thus relax the requirement of  
311 network contacts for the build-up of MP epidemics.

312

## 313 Results

### 314 **Special situation I: Network contact and cross-immunity alone**

315 150,000 combinations of model parameters were sampled with  $\nu = \mu = 1$  and  $\kappa$  ranging from  
316 2.5 to 7. Only 11222 combinations generate characteristically recurrent epidemics of MP that  
317 are of asynchronous strains and their features are shown in Figure 2. Other 214 combinations  
318 generate MP recurrent epidemics that are of synchronous strains (see Appendix A). The  
319 results shown in Figure 2A illustrate that reproducing the characteristically recurrent  
320 epidemics of MP is not possible unless the contact degree ( $\kappa$ ) is less than 6.0. That is, without  
321 strain interaction within the secondary infection (i.e.,  $\nu = \mu = 1$ ), it requires strong network-  
322 mediated spatial correlation (c.f., Rozhnova and Nunes. 2009; Zhang 2016) to enable MP  
323 epidemic cycling. When cross-immunity is not extremely strong (shown in Figure 2A), two  
324 strains asynchronously shift among epidemics; otherwise, they completely synchronise (see  
325 Figure A1A in Appendix; c.f., Zhang 2016). The infectious period is negatively correlated  
326 while the duration of immunity is positively correlated with the degree of contact (Figure 2B  
327 and 2C). This suggests that, all other parameters being equal: within a population of a  
328 relatively large contact degree, the infectious period will need to become shorter while the  
329 duration of immunity needs to become longer for recurrent epidemics consistent with those  
330 observed to occur. Recurrent epidemics generated by a population of small contact degree ( $\kappa$   
331 being just larger than 2.5) have a high coefficient of variation and show strong oscillations  
332 while those generated by the population of large contact degree ( $\kappa$  being just less than 6.0)  
333 have low coefficient of variation (Figure 2D). Compared to other parameter combinations,  
334 both situations result in slightly shorter durations of recurrent epidemics and cycles of  
335 dominant strain shift (Figure 2E and 2F), however. Cycles of dominant strain shift are  
336 positively associated with the presence of cross-immunity, the duration of immunity and the

337 infectious period (Figure 2G, 2H and 2I), whilst durations of recurrent epidemics are  
338 insensitive to these parameters (data not shown).

339

340 Two examples of the predicted recurrent epidemics are demonstrated in Figure 3: one is a  
341 regular recurrent epidemic and the other irregular. To illustrate the possible mechanisms of  
342 oscillation in incidence and the shift of the dominant serotype, we also plot the changes in the  
343 susceptible individuals, and the individuals that are immune to strain 1 alone, and to strain 2  
344 alone, and to both strains together. In Figure 3A MP epidemics occur regularly with epidemic  
345 period of exactly 4 years and the CV is 0.51. Two strains alternate the dominancy  
346 symmetrically from one epidemic to another: when one strain is dominant the other strain  
347 remains at extremely low activities. That is, each separate epidemic is mainly caused by one  
348 strain. In Figure 3B the duration of recurrent epidemics ranges from 3 years to 5 years with  
349 an average of four years. The average CV is 1.08, indicating a strong oscillation comparing to  
350 example shown in Figure 3A. The epidemics also vary in the total number of infections.  
351 During each epidemic, infections can be due to either mainly one strain or two strains  
352 simultaneously.

353

354 Comparisons of the upper and bottom graphs in each panel of Figure 3 show that infections  
355 oscillate following the changes in proportion of the population that is susceptible. The shift of  
356 the dominant strain during the oscillating epidemics is due to changes in the proportion of the  
357 population that is immune to different strains: The incidence of one strain will increase when  
358 the proportion of people immune to it is low; at the same time the incidence of the other  
359 strain will decrease because of the relatively high proportion of the population that is  
360 immune. This observation seems to support the hypothesis that a decline in immunity or an  
361 increase of the immunologically naïve population may result in the 4-year cycle of epidemic  
362 periods (Chalker *et al.*, 2011).

363

364 **Special situation II: Network contact and strain interactions via cross-immunity during re-**  
365 **infection and interactions within secondary infection**

366 Preliminary sampling experiments indicate that the number of parameter combinations that  
367 can generate MP recurrent epidemics decreases quickly as the degree of contacts increases.  
368 When the degree of contacts ( $\kappa$ ) exceeds 15, the combinations of model parameters for MP  
369 recurrent epidemics become extremely rare. To save the computational time, the model  
370 parameter values were sampled by dividing them into groups by the ranges of  $\kappa$ : 2.5–6, 6–8,  
371 8–10, 10–12, 12–14, 14–16, 16–17 with respective sampling sizes 200,000, 200,000,  
372 250,000, 250,000, 250,000, 250,000, 500,000. We obtained 23534 combinations of model  
373 parameter values that generate characteristically recurrent epidemics of MP that are of  
374 asynchronous strains; the maximum of  $\kappa$  is 16.2 (see Figure 4A). Other 4426 combinations  
375 generate MP recurrent epidemics that are of synchronous strains (see Appendix).

376

377 The results shown in Figure 4 indicate that compared to the above situation (I), allowing for  
378 strain interactions within secondary infections can lead to the characteristically recurrent  
379 epidemics of MP even in a population that has little network mediated spatial correlation. The  
380 maximum degree of contacts (16.2) is much larger than the maximum value of 5.9 that was  
381 required for situation I. The distributed patterns in Figure 4A, 4B and 4C suggest that there is  
382 a critical threshold in the degree of contacts (denoted by  $\kappa_{ac}$  for asynchronous strain recurrent  
383 epidemics thereafter) separating the mechanisms by which recurrent epidemics consistent  
384 with those seen for MP occur. For the parameter values given in Figure 4,  $\kappa_{ac}=6.0$ . For  
385 populations that are of contact degree  $\kappa < \kappa_{ac}$ , recurrent epidemics occur because of the spatial  
386 correlation induced by strong network structure whilst for the populations of relatively loose  
387 network structure ( $\kappa > \kappa_{ac}$ ), they occur because of the combination of spatial correlation and



388 strain interactions. We refer them as mechanism 1 and mechanism 2 respectively. It is clearly  
389 shown in Figure 4A that although cross-immunity can be any level from 0 to 1 under  
390 mechanism 1, only weak cross-immunity levels ( $<0.4$ ) are required under mechanism 2.

391

392 As shown above (special situation I), when  $\kappa < \kappa_{ac}$  (mechanism 1), characteristically MP  
393 recurrent epidemics are readily generated irrespective of whether the primary infection  
394 affects the secondary infection. When strain interactions are present, complicated epidemics  
395 can be generated (see Figure 5). Under the loose network structure ( $\kappa > \kappa_{ac}$ ) (mechanism 2),  
396 MP recurrent epidemics can be produced only when the primary infection enhances the  
397 infectivity ( $\nu > 1$ ) (Figure 4B) and prolongs the infectious period ( $\mu > 1$ ) (Figure 4C) of the  
398 secondary infection. Conversely, if strain interactions diminish the transmissibility of a  
399 secondary infection, shifts in the dominant strain in epidemics cannot occur. As in special  
400 situation I, relatively short infectious periods of MP at populations of high contact degree are  
401 required while relatively longer durations of immunity are needed to generate the recurrent  
402 MP epidemics (Figure 4D and 4E). The conditions for the emergence of synchronous strains  
403 are different and are shown in Appendix.

404

405 Dynamic patterns including the shape of oscillations and durations of recurrent epidemics and  
406 cycle of dominant strain shift are shown in Figure 4F-4L. Figure 4F shows that the shape of  
407 the epidemic curve (i.e., the coefficient of variance (CV) of incidence along the time) is  
408 positively correlated with  $\kappa$  when  $\kappa > \kappa_{ac}$ , while CV decreases with  $\kappa$  when  $\kappa \leq \kappa_{ac}$ . This  
409 suggests that within a looser networked population, the oscillation in incidence tends to  
410 become stronger. However, CV is not sensitive to the other model parameters (data not  
411 shown).

412

413 The cycle of dominant strain shift ranges from 3 to 30 years (Figure 4G), which covers the  
414 observational ranges: 10–16 years (Kendri *et al.*, 2008; Kogoj *et al.*, 2017). Figure 4J  
415 indicates that when  $\kappa < \kappa_{ac}$ , the cycle of dominant strain shift can be 1–6 times the duration of  
416 recurrent epidemics; when  $\kappa > \kappa_{ac}$ , the cycle of dominant strain shift approximates the  
417 epidemic cycle. Both the duration of recurrent epidemics and cycle of dominant strain shift  
418 are positively associated with the duration of immunity, especially under mechanism 2  
419 (Figure 4H and 4L). Under mechanism 2, they are weakly and positively associated with the  
420 infectious period (Figure 4I and 4K). Otherwise, they are insensitive to other parameters (see  
421 Figure 4G for the relationship between cycle of dominant strain shift and degree of contacts).

422

423 Four typically recurrent epidemic examples are illustrated in Figure 5. They show different  
424 oscillation patterns. In panel A) two strains are of comparable activity levels with the strain  
425 that starts early dominating the epidemics; strain dominancy alternates regularly among  
426 epidemics cycle and oscillate with the same period of four years. In panel B) two strains shift  
427 dominancy with each strain dominating two epidemics consecutively before switching strain  
428 dominancy; the two consecutive epidemics are mainly activated by the dominant strain while  
429 the other strain remains at very low activity. In panel C) although epidemics take place  
430 regularly, recurrent epidemics consist of two different epidemics: one with high peak and  
431 narrow active period, the other with lower peak but wide active period; two strains alternate  
432 their dominancy accordingly. In panel D) two strains alternate with irregular peaks and total  
433 incidence within each epidemic. The diverse patterns may mimic real observations in MP  
434 epidemics (Kenri *et al.*, 2008; Brown *et al.*, 2016).

435

436 Comparing the levels of infection and of immunity can shed light on the underlying  
437 mechanisms of recurrent epidemics. It is obvious from the Figure 5 that the proportion of  
438 individuals that are simultaneously immune to both strains is kept low except for panel A)  
439 where it oscillates within a wide range and anti-correlates with the proportion susceptible.  
440 The proportion of individuals immune to one strain is temporally highly anti-correlated with  
441 the proportion of these immune to the other strain, with absolute correlation coefficients  
442 >80% for panels B), C) and D); while for panel A) they are weakly correlated. This  
443 difference reflects their different levels of cross-immunity. Panels A) and B) show  
444 predictions obtained for a situation in which the primary infection strain increases the  
445 infectivity of secondary strain ( $v > 1$ ). In panel A) although the dominant strain shifts between  
446 among epidemics, the difference in the proportion immune or susceptible to the dominant and  
447 non-dominant strains is small. In panel B), one strain is dominant while the other remains at a  
448 very low incidence, which continues over further epidemics even if the proportion of  
449 individuals that are immune to the strain exceeds the proportion that is immune to the other  
450 strain. The dominancy only changes when the difference in immunity to a given strain  
451 increases substantially. So under this situation, every strain dominates continuously over two  
452 epidemics before the strain dominancy switches. As found for situation I, oscillations in the  
453 infection incidence follow changes in the proportion of the population that is immune and  
454 susceptible. The change of dominant strain during the recurrent epidemics is due to the  
455 exchange in immunity to different strain: the increase in infection activity of one strain  
456 follows the relatively low immunity to the strain (Chalker *et al.*, 2011).

457

458 The findings assuming values for  $R_0$  of 1.3 and 1.5 are similar to those obtained assuming a  
459 value of 1.7, although the critical threshold value in the degree of contacts differs (see Figure

460 6). Under low values for  $R_0$  (1.3), for example, the critical degree of contact decreases to  
461  $\kappa_{ac}=4.7$  and the maximum contact degree decreases to 7.4.

462

## 463 Discussion

464 In this study we demonstrate that spatial correlation mediated by contact network of human  
465 population and positive strain interactions within secondary infection work cooperatively to  
466 drive MP infection incidence into recurrent epidemics occurring every three to seven years  
467 with dominant strains shifting among epidemics.

468

469 Accounting for realistic host population structure in infectious disease modelling is  
470 important. It has been recognised that it is necessary to take true network contacts among  
471 human populations to explain the observed dissemination patterns of infectious disease (e.g.,  
472 Brockmann and Helbing, 2013). The results shown in Figure 2 where no strain interaction is  
473 assumed illustrate that contact networks of degree less than 6 are required for the recurrent  
474 epidemics that occur every 3–7 years with alternation of dominant strain. A key property of a  
475 network is its degree distribution. For community, school and hospital networks, empirical  
476 studies suggest that the average degree is 6.5 (Leventhal *et al.*, 2015). This empirical  
477 information of human contact networks therefore suggests that the network model without  
478 strain interaction within secondary infection could not be a candidate mechanism for MP  
479 recurrent epidemics.

480

481 Interaction between different strains during re-infection (i.e. cross-immunity) is well known  
482 and has attracted much effort to study and measure it. Once an individual is re-infected by  
483 another strain, are there any interactions between the primary infection strain and the  
484 secondary infection strain within the secondary infection? Surely recovery from primary

485 infection will not leave immunocompetent host individuals naïve. It is theoretically  
486 reasonable to argue that the non-naïve individuals would have other changes which might in  
487 some ways alter the secondary infection by other strains (see Zhang and Cao, 2014 for more  
488 general reasoning). As MP parasitizes the respiratory tract epithelium of humans, the primary  
489 infection with one strain can, for example, damage the airway (Song *et al.*, 2015), which  
490 could then alter the ecological niche of the secondary infection strain. Further, the primary  
491 infections of the upper or lower respiratory tract can be followed by extrapulmonary  
492 complications (Tsiodras *et al.*, 2005). As far as the transmission dynamics are concerned, the  
493 modifications in the non-naïve individuals might change the infectivity and duration of  
494 secondary infection. To our knowledge, we have not found any clear empirical data for these  
495 interactions among strains of MP, although this may reflect a lack of research into MP  
496 pathogenicity. In principle, prior exposure of an individual to a strain could have no effect or  
497 either decrease or increase the individual's ability to clear an infection with a differing strain,  
498 with potential to increase or reduce the overall transmission. The theoretical analysis in this  
499 study shows that only positive strain interactions increase the infectiousness of a secondary  
500 infection to facilitate the generation of recurrent MP epidemics. It is expected that the  
501 experimental observations and measurement of strain interactions within secondary infections  
502 will provide vital proof to support or disprove the combination of network mediated spatial  
503 correlations and strain interactions with secondary infections as a determinant of epidemic  
504 recycling of MP.

505

506 We found that there is a positive association between the durations of recurrent epidemics  
507 and the duration of immunity (Figure 4H). This finding is consistent with that of Goncalves *et*  
508 *al.* (2011) but differ from that of Omori *et al.* (2015). Further, the cycle of dominant strain  
509 shift also shows positive correlations with the duration of immunity (Figure 4L). These

510 positive correlations become stronger under the mechanism whereby recurrent epidemics are  
511 generated by the combination of network mediated spatial correlations and strain interactions  
512 with secondary infection. Under this mechanism, both cycles are intermediately linked with  
513 the infectious period (Figure 4I and 4K). In contrast to the observations of Keeling and  
514 Rohani (2008) and Omori *et al.* (2015), the cycle of the dominant strain shift is insensitive to  
515 cross-immunity.

516

517 Despite our simplifying assumptions, the network model of the transmission dynamics of two  
518 strains presented here remains complicated. The distributions of both infectious period and  
519 the duration of immunity are implicitly assumed to be exponential. Omori *et al.* (2015)  
520 suggested that assuming that the duration of immunity follows a distribution with a variance  
521 about 0.63, which is much smaller than that of the exponential distribution, models that  
522 assume that people mix randomly can produce the periodicity of MP recurrent epidemics.  
523 Can the reduced variation in the distribution of the duration of immunity help build up the  
524 recurrent epidemics in our network model? To see this, we construct a  $SI_1I_2R_1R_1R_2R_2J_1J_2RR$   
525 network model by separating recovery stages into two equal parts. Therein the immunity  
526 period follows a gamma distribution of shape parameter  $=2$ . This model has 11 nodes and is  
527 described by 65 differential equations. Nonetheless, the simulations (data not shown) show  
528 that this more complicated model does not give any noticeably different results. It is a  
529 technical challenge in our network model to generate gamma distributed duration of  
530 immunity that is comparable to that required in Omori *et al.* (2015).

531

532 We modelled human population structure as a static, unweighted network wherein each  
533 individual has an equal number of links with other people. The real-world contacts between  
534 individuals are dynamic and the network degree of contacts varies from person to person

535 (e.g., Guclu *et al.*, 2016). How these heterogeneities in contact networks affect the model  
536 results, albeit being worth further analysing, is an analytically and computationally  
537 challenging issue.

538

539 In this study we constrained both the interaction parameters  $\nu$  and  $\mu$ , which describe the  
540 effects of primary infection strain on the infectivity and duration of infection by secondary  
541 strain respectively, at the ranges from 0.5 to 2.0. If we had widened their ranges, requirement  
542 for the limited contact degree is further reduced. This is in agreement with the previous  
543 studies (Zhang and Cao, 2014): under strong strain interactions alone, epidemic cycling  
544 becomes possible even under assumptions of the homogenous mixing.

545

546 In conclusion, we have illustrated that multiple strains that co-circulate within a network  
547 structured population and interact positively as secondary infections with primary infections  
548 generate the MP epidemics of 3–7 year interval and alternating dominant strains. This model  
549 supports the theory that epidemic shifts in MP may be attributed to population immunity not  
550 only to the immunogenic strain in question, but also with the influence of cross protection  
551 and other enhanced effects from the second strain type and that transmission via patient  
552 networks within the population combine to produce MP epidemic cycles. Though the strain  
553 interactions within a secondary infection are theoretically possible, currently no reliable  
554 evidence exists to suggest whether either a positive or negative strain interaction occurs. We  
555 hope this study can encourage experimental studies to detect and measure interactions  
556 between strains of MP. This will benefit our understanding of MP and provide crucial  
557 information for us to predict and thus control its recurrence.

558

559 Acknowledgments

560 The work was carried out whilst the authors were employed by Public Health England. We  
561 thank Elaine Stanford for her kind support for this work.

562

563 **Competing interests**

564 The author declares that he has no competing interests

565



566 References

- 567 Anderson RM and May RM. 1991. *Infectious disease of humans: dynamics and control*.  
568 Oxford: Oxford University Press.
- 569 Brockmann D, Helbing D. 2013. The hidden geometry of complex, network-driven  
570 contagion phenomena. *Science* **342**:1337-1342. doi: 10.1126/science.1245200
- 571 Brown RJ, Holden MT, Spiller OB, Chalker, VJ. 2015. Development of a multilocus  
572 sequence typing scheme for molecular typing of *Mycoplasma pneumoniae*. *Journal of*  
573 *Clinical Microbiology* **53**:3195–3203. doi:10.1128/JCM.01301-15
- 574 Brown RJ, Nguipdop-Djomo P, Zhao H, Stanford E, Brad Spiller O, Chalker VJ. 2016.  
575 *Mycoplasma pneumoniae* Epidemiology in England and Wales: A national  
576 perspective. *Frontiers in Microbiology* **7**:157. doi:10.3389/fmicb.2016.00157
- 577 Chalker VJ, Stocki T, Mentasti M, Fleming D, Harrison TG. 2011. Increased incidence of  
578 *Mycoplasma pneumoniae* infection in England and Wales in 2010: multilocus  
579 variable number tandem repeat analysis typing and macrolide susceptibility.  
580 *Euro Surveillance* **16**(19):pii=19865. Available online:  
581 <http://www.eurosurveillance.org/ViewArticle.aspx?ArticleId=19865>
- 582 Clyde WA. 1993. Clinical overview of typical *Mycoplasma-Pneumoniae* infections. *Clinical*  
583 *Infectious Diseases* **17**: S32–S36.
- 584 Diekmann O, Heesterbeek H, Britton T. 2013. *Mathematical tools for understanding*  
585 *infectious disease dynamics*. Princeton University Press, Princeton and Oxford.
- 586 Dorigo-Zetsma JW, Dankert J, Zaat SA. 2000. Genotyping of *Mycoplasma pneumoniae*  
587 clinical isolates reveals eight P1 subtypes within two genomic groups. *Journal of*  
588 *Clinical Microbiology* **38**: 965–970. PMID: 10698981
- 589 Dumke R, von Baum H, Lück PC, Jacobs E. 2010. Subtypes and variants of *Mycoplasma*  
590 *pneumoniae*: local and temporal changes in Germany 2003-2006 and absence of a  
591 correlation between the genotype in the respiratory tract and the occurrence of  
592 genotype-specific antibodies in the sera of infected patients. *Epidemiology and*  
593 *Infection* **138**(12):1829-1837. <https://doi.org/10.1017/S0950268810000622>
- 
- 594 Dumke R, Jacobs E. 2011. Culture-independent multi-locus variable-number tandem-repeat  
595 analysis (MLVA) of *Mycoplasma pneumoniae*. *Journal of Microbiological Methods*  
596 **86**(3):393-396. doi:10.1016/j.mimet.2011.06.008
- 
- 597 Dumke R, Strubel A, Cyncynatus, C, Nuyttens H, Herrmann R, Lück C, Jacobs E. 2012.

- 598 Optimized serodiagnosis of *Mycoplasma pneumoniae* infections. *Diagnostic*  
599 *Microbiology and Infectious Disease* **73**:200–203. doi:10.1016/j.diagmicrobio.2012.  
600 02.014
- 
- 601 Dumke R, Jacobs E. 2016. Antibody Response to *Mycoplasma pneumoniae*: Protection of  
602 Host and Influence on Outbreaks? *Frontiers in Microbiology* **7**:39. doi:10.3389/fmicb.  
603 2016.00039
- 
- 604 Eames KTD, Keeling MJ. 2002. Modelling dynamic and network heterogeneities in the  
605 spread of sexually transmitted diseases. *Proc Natl Acad Sci USA* **99**:13330-13335.  
606 <https://doi.org/10.1073/pnas.202244299>
- 607 Foy HM, Kenny GE, Sefi R, Ochs HD, Allen ID. 1977. Second attacks of pneumonia due to  
608 *Mycoplasma pneumoniae*. *Journal of Infectious Disease* **135**:673-677. PMID:856921
- 609 Foy HM. 1993. Infections caused by *Mycoplasma pneumoniae* and possible carrier state in  
610 different populations of patients. *Clinical Infectious Diseases* **17**:S37–S46.  
611 doi:10.1093/clinids/17.Supplement\_1.S37
- 612 Goncalves S, Abramson G, Gomes MFC. 2011. Oscillations in SIRS model with distributed  
613 delays. *European Physical Journal B* **81**:363–371. [https://doi.org/10.1140/epjb/](https://doi.org/10.1140/epjb/e2011-20054-9)  
614 e2011-20054-9
- 615 Guclu H, Read J, Vukotich Jr CJ, Galloway DD, Gao H, Rainey JJ, Uzicanin A, Zimmer SM,  
616 Cummings DA. 2016. Social Contact Networks and Mixing among Students in K-12  
617 Schools in Pittsburgh, PA. *PLOS One* **11**(3):e0151139. doi:10.1371/journal.pone.  
618 0151139
- 619 Iman RL, Helton JC, [Campbell JE](#). 1981. An approach to sensitivity analysis of computer  
620 models, Part 1. Introduction, input variable selection and preliminary variable  
621 assessment. *Journal of Quality Technology* **13**(3):174–183.
- 
- 622 Ito I, Ishida T, Osawa M, Arita M, Hashimoto T, Hongo T, Mishima M. 2001. Culturally  
623 verified *Mycoplasma pneumoniae* pneumonia in Japan: a long-term observation from  
624 1979-99. *Epidemiology and Infection* **127**:365–367. doi: 10.1017/s0950268801005982
- 
- 625 Jacobs E. 2012. *Mycoplasma pneumoniae*: now in the focus of clinicians and  
626 epidemiologists. *Euro Surveillance* **17**:20084.  
627 <http://www.eurosurveillance.org/ViewArticle.aspx?ArticleId=20084>
- 628 Kenri T, Okazaki N, Yamazaki T, Narita M, Izumikawa K, Matsuoka M, Suzuki S, Horino

- 629 A, Sasaki T. 2008 Genotyping analysis of *Mycoplasma pneumoniae* clinical strains in  
630 Japan between 1995 and 2005: type shift phenomenon of *M. pneumoniae* clinical  
631 strains. *Journal of Medical Microbiology* **57**:469-475. doi:10.1099/jmm.0.47634-0.
- 632 Keeling MJ, Rohani P. 2008. *Modelling Infectious Disease in Humans and Animals*.  
633 Princeton. NJ, USA: Princeton University Press.
- 634 Kogoj R, Praprotnik M, Mrvič T, Korva M, Kese D. 2017. Genetic diversity and macrolide  
635 resistance of *Mycoplasma pneumoniae* isolates from two consecutive epidemics in  
636 Slovenia. *European Journal of Clinical Microbiology and Infectious Diseases* **37**:99-  
637 107. <https://doi.org/10.1007/s10096-017-3106-5>
- 638 Korppi M, Heiskanen-Kosma T, Kleemola M. 2004. Incidence of community-acquired  
639 pneumonia in children caused by *Mycoplasma pneumoniae*: serological results of  
640 a prospective, population-based study in primary healthcare. *Respirology* **9**:109–  
641 114. doi:10.1111/j.1440-1843.2003.00522.x
- 642 Leventhal GE, Hill AL, Nowak MA, Bonhoeffer S. 2015. Evolution and emergence of  
643 infectious diseases in theoretical and real-world network. *Nature Communications*  
644 **6**:6101. doi:10.1038/ncomms7101 (2015).
- 645 Lind K, Benzoni MW, Skov Jensen J, Clyde WA. 1997. A seroepidemiological study of  
646 *Mycoplasma pneumoniae* infections in Denmark over 50-year period 1946-1995.  
647 *European Journal of Epidemiology* **13**:581-586.  
648 <https://doi.org/10.1023/A:1007353121693>
- 649 Martinez MA, Ruiz M, Zunino E, Luchsinger V, Aguirre R, Avendano LF. 2010.  
650 Identification of P1 types and variants of *Mycoplasma pneumoniae* during an  
651 epidemics in Chile. *Journal of Medical Microbiology* **59**:925-929. doi:  
652 10.1099/jmm.0.018333-0.
- 653 Morozumi M, Iwata S, Hasegawa K, Chiba N, Takayanagi R, Matsubara K, Nakayama E,  
654 Sunakawa K, Ubukata K. 2008. Increased macrolide resistance of *Mycoplasma*  
655 *pneumoniae* in paediatric patients with community acquired pneumonia. *Antimicrob*  
656 *Agents Chemother* **52**:348–350. doi: [10.1128/AAC.00779-07](https://doi.org/10.1128/AAC.00779-07)
- 657 Mossong J, Hens N, Jit M, Beutels P, Auranen K, Mikolajczyk R, Massari M, Salmaso S,  
658 Tomba GS, Wallinga J, Heijne J, Sadkowska-Todys M, Rosinska M, Edmunds WJ.  
659 2008. Social contacts and mixing patterns relevant to the spread of infectious diseases.  
660 *PLoS Medicine* **5**:e74. <https://doi.org/10.1371/journal.pmed.0050074>
- 661 Nakata Y, Omori R. 2015. Delay equation formulation for an epidemic model with waning

- 662 immunity: an application to mycoplasma pneumoniae. *IFAC-PapersOnLine* **48**:132-  
663 135. <https://doi.org/10.1016/j.ifacol.2015.11.024>
- 664 Nguipodop-Djomo P, Fine PEM, Halsby KD, Chalker VJ, Vynnycky E. 2013. Cyclic  
665 epidemics of *Mycoplasma pneumoniae* infections in England and Wales from 1975 to  
666 2009: time-series analysis and mathematical modelling. *Lancet* **382**:S78.  
667 doi:10.1016/S0140-6736(13)62503-9
- 668 Omori R, Nakata Y, Tessmer HL, Suzuki S, Shibayama K. 2015. The determinant of  
669 periodicity in *Mycoplasma pneumoniae* incidence: an insight from mathematical  
670 modelling. *Scientific Reports* **5**:14473. DOI:10.1038/SREP14473
- 671 Pastor-Satorras R, Vespignani A. 2001. Epidemic spreading in scale-free networks. *Physical*  
672 *Review Letter* **86**:3200–3. Doi:10.1103/PhysRevLett.86.3200
- 673 Pereyre S, Charron A, Hidalgo-Grass C, Touati A, Moses AE, Nir-Paz M, Bebear C. 2012.  
674 The Spread of *Mycoplasma pneumoniae* Is Polyclonal in Both an Endemic Setting in  
675 France and in an Epidemic Setting in Israel. *PLoS ONE* **7**(6): e38585.  
676 doi:10.1371/journal.pone.0038585
- 677 R Development Core Team. 2015. R: a language and environment for statistical computing.  
678 <https://www.r-project.org/>
- 
- 679 Rozhnova G, Nunes A. 2009. Fluctuation and oscillations in a simple epidemic model.  
680 *Physical Review E* **79**:041922. doi:<https://doi.org/10.1103/PhysRevE.79.041922>
- 681 Simmons WL, Daubenspeck JM, Osborne JD, Balish MF, Waites KB, Dybvig K. 2013. Type  
682 1 and type 2 strains of *Mycoplasma pneumoniae* form different biofilms.  
683 *Microbiology* **159**:737-747. doi:10.1099/mic.0.064782-0.
- 
- 684 Song Q, Xu B-P, Shen K-L. 2015. Effects of bacterial and viral co-infections of mycoplasma  
685 pneumoniae in children: analysis report from Beijing Children's hospital between  
686 2010 and 2014. *International Journal Clinical and Experimental Medicine*  
687 **8**(9):15666-15674. PMID:26629061
- 688 Spuesens EB, Oduber M, Hoogenboezem T, Sluijter M, Hartwig NG, van Rossum AM, Vink  
689 C. 2009. Sequence variations in RepMP2/3 and RepMP4 elements reveal  
690 intragenomic homologous DNA recombination events in *Mycoplasma pneumoniae*.  
691 *Microbiology* **155**:2182-2196. PMID:19389769
- 
- 692 Suzuki Y, Seto J, Itagaki T, Aoki T, Abiko C, Matsuzaki Y. 2015. Gene mutations associated

- 693 with macrolide-resistance and p1 genotyping of *Mycoplasma pneumoniae* isolated in  
694 Yamagata, Japan, between 2004 and 2013. *Kansenshogaku Zasshi* **89**:16–22.  
695 <https://doi.org/10.11150/kansenshogakuzasshi.89.16>
- 
- 696 [The World Fact-book Life Expectancy](https://www.cia.gov/library/publications/the-world-factbook/fields/2102.html). Cia.gov. 2012. [https://www.cia.gov/library/](https://www.cia.gov/library/publications/the-world-factbook/fields/2102.html)  
697 [publications/the-world-factbook/fields/2102.html](https://www.cia.gov/library/publications/the-world-factbook/fields/2102.html)
- 698 Tsiodras S, Kelesidis I, Kelesidis T, Stamboulis E, Giamarellou H. 2005. Central nervous  
699 system manifestations of *Mycoplasma pneumoniae* infections. *Journal of Infection*  
700 **51**(5):343-354. doi:[10.1016/j.jinf.2005.07.005](https://doi.org/10.1016/j.jinf.2005.07.005)
- 701 Waites KB, Talkington DF. 2004. *Mycoplasma pneumoniae* and its role as a Human  
702 pathogen. *Clinical Microbiology Reviews* **17**(4):672-728. doi:[10.1128/CMR.17.4.697-](https://doi.org/10.1128/CMR.17.4.697-728.2004)  
703 [728.2004](https://doi.org/10.1128/CMR.17.4.697-728.2004)
- 704 Watts DJ, Strogatz SH. 1998. Collective dynamics of small world networks. *Nature* **393**:440–  
705 442. doi:[10.1038/30918](https://doi.org/10.1038/30918)
- 706 Winchell JM. 2013. *Mycoplasma pneumoniae* – A national public health perspective. *Current*  
707 *Pediatric Reviews* **9**(4). doi:[10.2174/15733963113099990009](https://doi.org/10.2174/15733963113099990009)
- 
- 708 Woodhead M, Macfarlane J. 2000. Local antibiotic guidelines for adult community-acquired  
709 pneumonia (CAP): a survey of UK hospital practice in 1999. *Journal of Antimicrobial*  
710 *Chemotherapy*. **46**:141-143. PMID:10882705
- 711 Zhang X-S. 2016. Epidemic cycling in a multi-strain SIRS epidemic network model.  
712 *Theoretical Biology and Medical Modelling* 13:14 doi:[10.1186/s12976-016-0040-7](https://doi.org/10.1186/s12976-016-0040-7)
- 713 Zhang X-S, Cao K-F. 2014. The Impact of Coinfections and Their Simultaneous  
714 Transmission on Antigenic Diversity and Epidemic Cycling of Infectious  
715 Diseases. *BioMed Research International* 375862 doi:[10.1155/2014/375862](https://doi.org/10.1155/2014/375862)
- 716 Zhao F, Liu G, Wu J, Cao B, Tao X, He L, Meng F, Zhu L, Lv M, Yin Y, Zhang J. 2013.  
717 Surveillance of macrolide-resistant *Mycoplasma pneumoniae* in Beijing, China,  
718 from 2008 to 2012. *Antimicrob. Agents Chemother.* **57**:1521–1523. doi:[10.1128/AAC.](https://doi.org/10.1128/AAC.02060-12)  
719 [02060-12](https://doi.org/10.1128/AAC.02060-12)
- 720 Zhao F, Liu L, Tao X, He L, Meng F, Zhang J. 2015. Culture-independent detection and  
721 genotyping of *Mycoplasma pneumoniae* in clinical specimens from Beijing China.  
722 *PLoS ONE* **10**:e0141702. doi: [10.1371/journal.pone.0141702](https://doi.org/10.1371/journal.pone.0141702)
- 723

724 Figures  
725

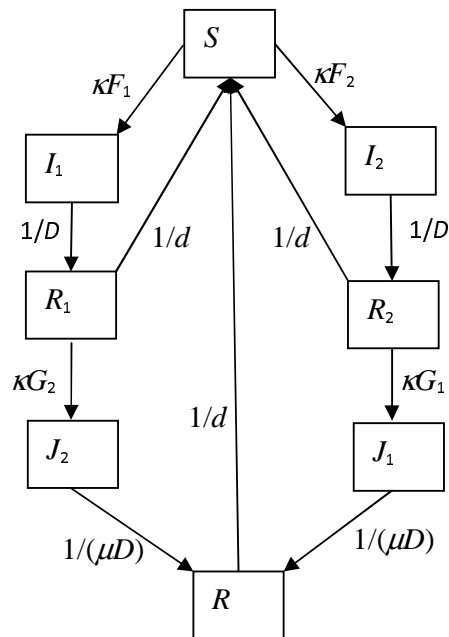

726  
727

728 Figure 1 Flow chart of the two-strain SIRS epidemic model. Arrows indicate transitions.  
729 Expressions next to arrows show the *per capita* flow rate between compartments. Births and  
730 deaths are not shown. Parameter  $\kappa$  is the degree of contacts each person has and  $\mu$  is the  
731 effect of primary infection strain on the duration of infection by the secondary strain.  
732 Variables  $F_1$  ( $F_2$ ) and  $G_1$  ( $G_2$ ) are forces of infection of strain 1 (strain 2) that are defined in  
733 equations (4).

734

735

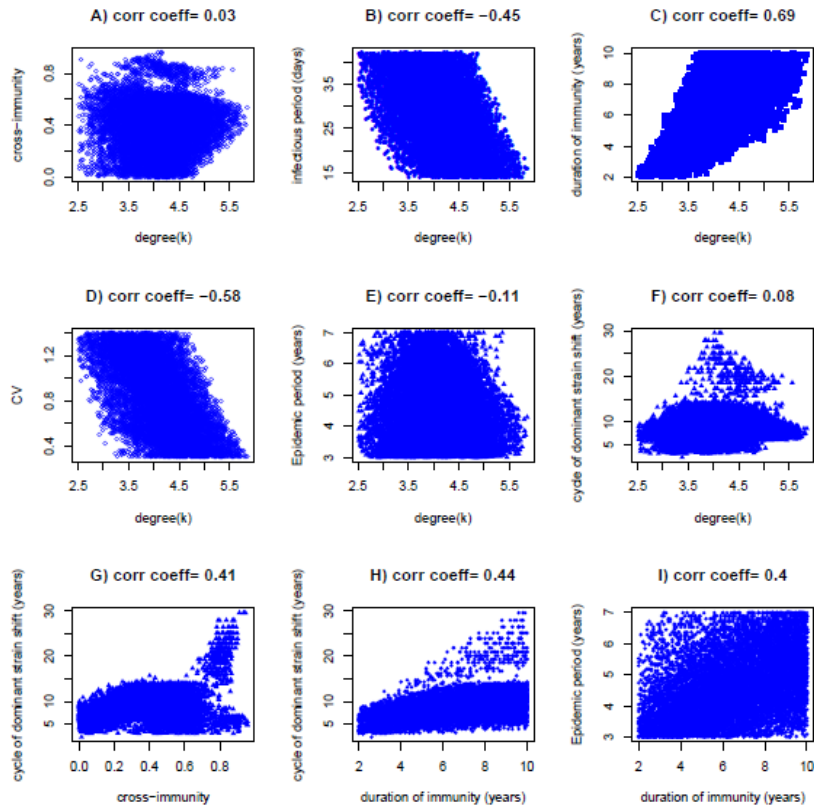

736  
737

738 Figure 2 Features of LH sampling of model parameters and dynamic patterns of incidence  
 739 caused by two asynchronous strains under condition of no interactions within the secondary  
 740 infection (i.e.,  $\nu = \mu = 1$ ). An average life span of 70 years and basic reproduction number  
 741  $R_0=1.7$  are assumed. As  $\kappa$  increases (i.e., network becomes weak), to reproduce epidemic  
 742 cycles consistent with those observed, the infectious period needs to decrease while the  
 743 duration of immunity needs to increase.

744

745

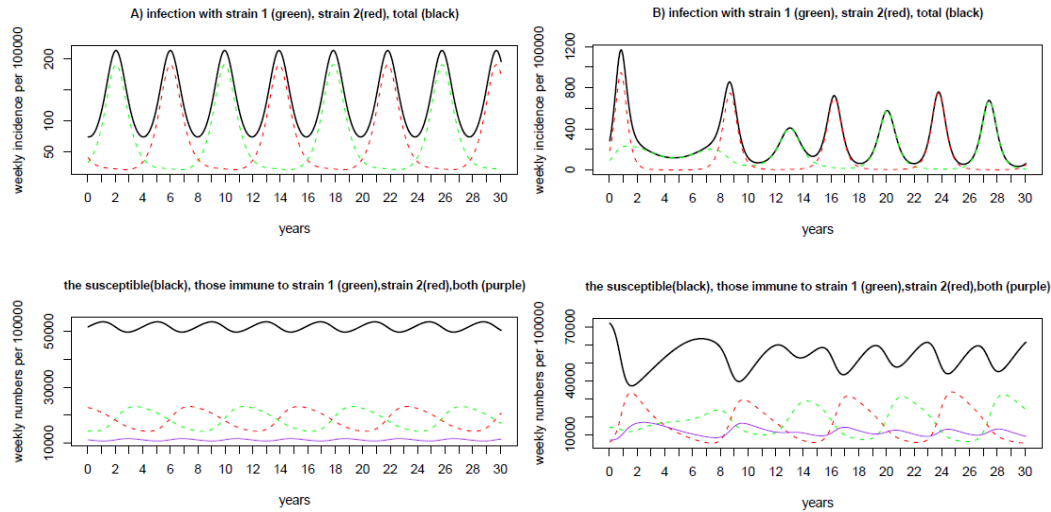

746

747

748 Figure 3 Two examples of epidemic curve from LHS samples under the situation of no  
749 interaction within the secondary infection (i.e.,  $\nu=\mu=1$ ). Panel A)  $\kappa=5.69$ ,  $\psi=0.415$ ,  $D =$   
750  $17.2$  days and  $d = 9.2$  years, EpiT =4 years, CV =0.51; panel B)  $\kappa=3.34$ ,  $\psi=0.202$ ,  $D =37.7$   
751 days,  $d = 4.1$  years, and EpiT =4 years, CV =0.93. The legend is provided in the title to each  
752 figure. It is obvious that the proportion of individuals that are simultaneously immune to both  
753 strains is kept low in the two examples. The proportion of individuals immune to one strain  
754 alone is temporally highly anti-correlated with the proportion of these immune to the other  
755 strain alone, with the correlation coefficient -95% and -84% for panel A) and panel B)  
756 respectively.



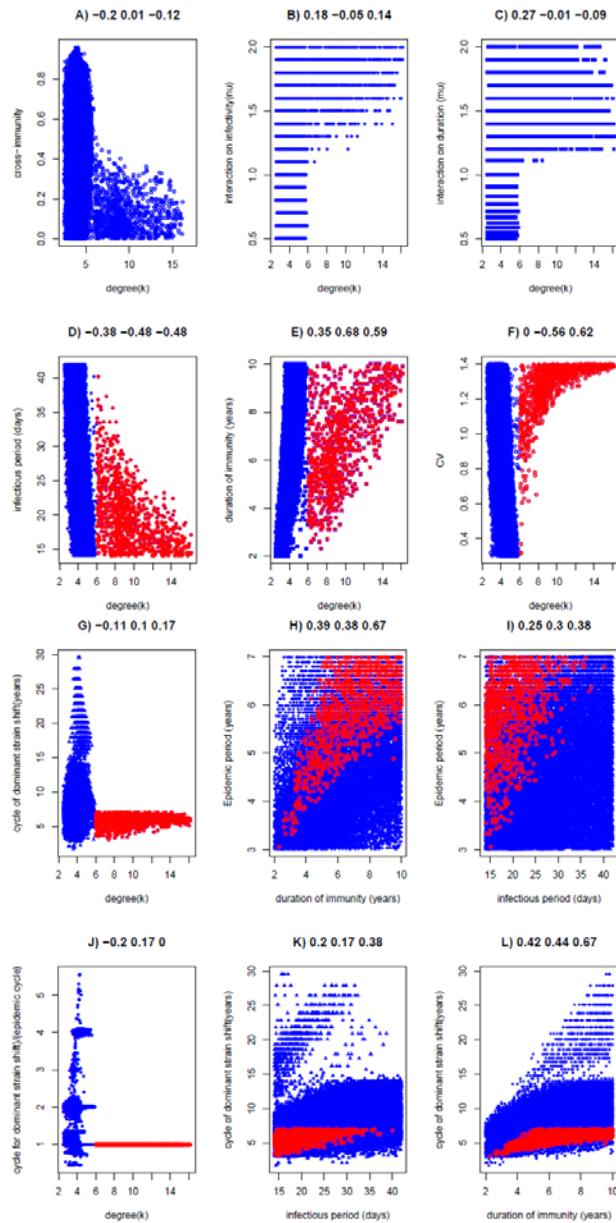

757

758

759

760 Figure 4 Features of LH samplings of model parameters and dynamic patterns of incidence  
 761 caused by two asynchronous strains with interactions within the secondary infection. An  
 762 average life span of 70 years and basic reproduction number  $R_0=1.7$  are assumed. Panel A  
 763 shows the maximum degree of contacts is 16.2 while panel B and C show that the critical  
 764 degree for the asynchronous strains is  $\kappa_{ac}=6.0$ . In panels D-P) the blue points represent the  
 765 parameter values when contact degrees  $\kappa \leq \kappa_{ac}$  and the red points those with contact degrees  
 766  $\kappa > \kappa_{ac}$ . The three values above each panel represent the correlation coefficients between the  
 767 two variables for all values, the values when  $\kappa \leq \kappa_{ac}$ , and the values when  $\kappa > \kappa_{ac}$ .

768

769

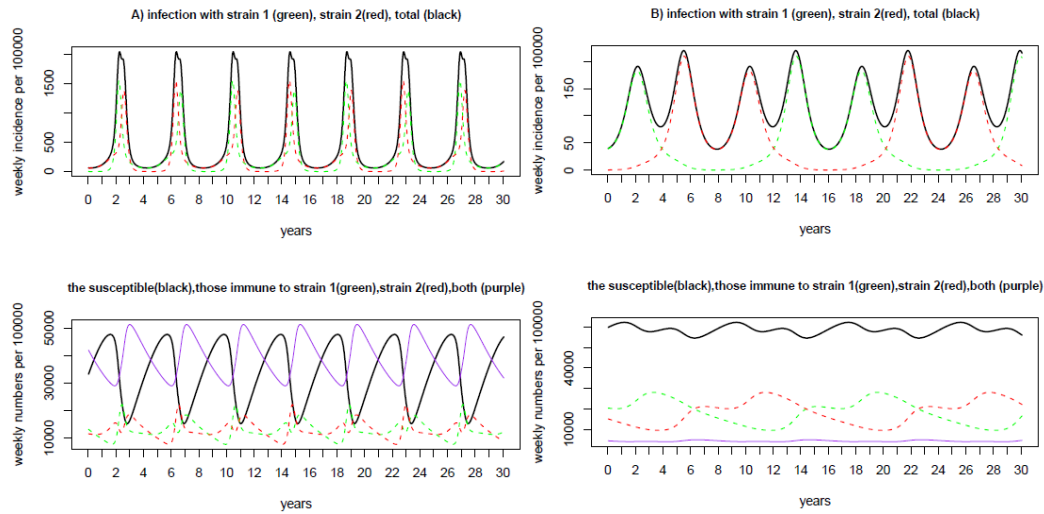

770

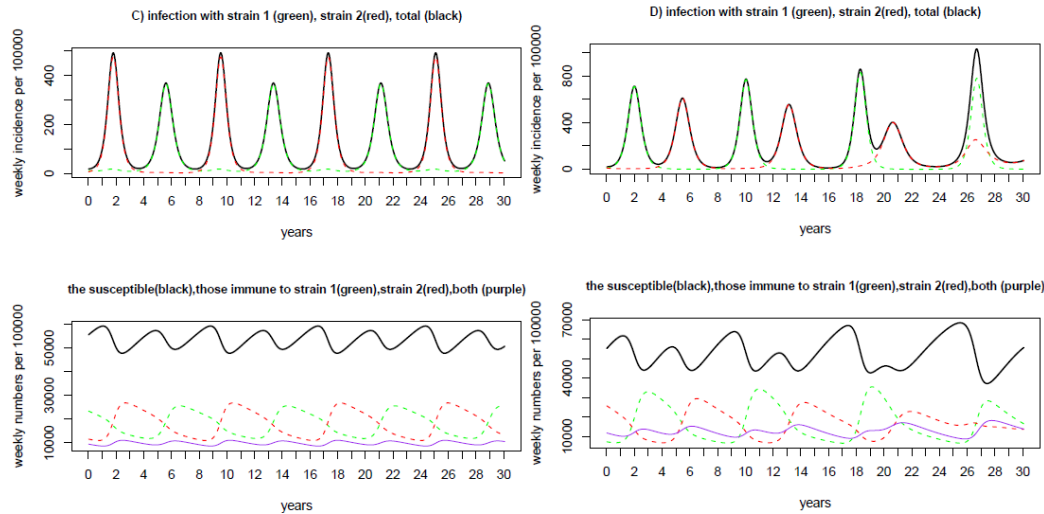

771

772

773

774

775

776

777

778

779

Figure 5 Four examples of epidemic curve from LHS samples that generate MP recurrent epidemics with strain interactions within the secondary infection. Panel A)  $\kappa=8.79$ ,  $\psi=0.012$ ,  $D=15.4$  days,  $d=4.3$  years,  $\nu=1.8$ ,  $\mu=1.43$ , and  $EpiT=4$  years,  $CV=1.16$ ; B)  $\kappa=5.04$ ,  $\psi=0.7$ ,  $D=14.4$  days,  $d=8.6$  years,  $\nu=1.4$ ,  $\mu=0.59$ , and  $EpiT=4$  years,  $CV=0.479$ ; C)  $\kappa=5.02$ ,  $\psi=0.424$ ,  $D=14.1$  days,  $d=8.8$  years,  $\nu=1.2$ ,  $\mu=0.77$ , and  $EpiT=4$  years,  $CV=0.896$ ; D)  $\kappa=3.67$ ,  $\psi=0.185$ ,  $D=32.6$  days,  $d=5.4$  years,  $\nu=1.6$ ,  $\mu=0.63$ , and  $EpiT=4$  years,  $CV=0.598$ . The legend is provided in the title to each figure.

780

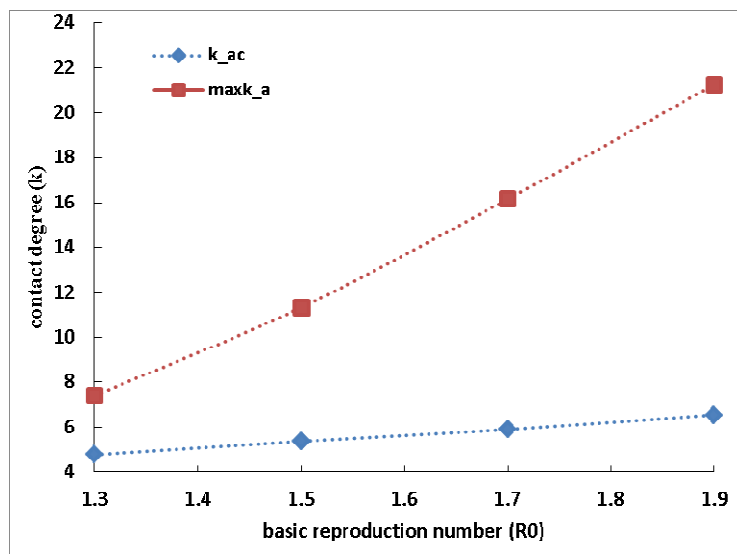

781

782

783

784

Figure 6 Critical threshold degrees of contacts under different transmissibility

785

786 Tables

787

788 Table 1 Model parameters.

| parameter | Definition                                                                                                  | Values or ranges                                    | source                                  |
|-----------|-------------------------------------------------------------------------------------------------------------|-----------------------------------------------------|-----------------------------------------|
| $L$       | Average life span                                                                                           | 70*365 days                                         | The World Fact-book Life Expectancy     |
| $D$       | Infectious period of a single infection                                                                     | 14 – 42 days                                        | Clyde, 1993; Omori <i>et al.</i> , 2015 |
| $d$       | Duration of immunity                                                                                        | 2 – 10 years                                        | Lind <i>et al.</i> , 1997               |
| $R_0$     | Basic reproduction number                                                                                   | 1.7                                                 | Nguipdop-Djomo <i>et al.</i> , 2013     |
| $\lambda$ | Transmission rate of single infection                                                                       | $\lambda = \frac{R_0(d+1)}{D[d(k-2) + (\kappa-1)]}$ | Eames and Keeling, 2002                 |
| $\psi$    | Reduction in susceptibility to a secondary infection, resulting from a primary infection (“cross-immunity”) | 0.0 – 1.0                                           | –                                       |
| $\nu$     | Relative infectiousness of a secondary infection, compared to a primary infection.                          | 0.5 – 2.0                                           | Negative (<1) and positive (>1) effects |
| $\mu$     | Factor by which the duration of a secondary infection differs from that of a primary infection.             | 0.5 – 2.0                                           | Negative (<1) and positive (>1) effects |
| $\kappa$  | Degree of contact network: number of people with whom one person has contact.                               | 2.5 – 25.0                                          | assumed                                 |

789

790
